# Supplementary material for: Global ocean spatial suitability for macroalgae offshore cultivation and sinking
Source: Frontiers journal article supplement (doi:10.3389/fmars.2023.1320642), 2023-11-30
Supplement: Data_Sheet_1.docx [file Data_Sheet_1.docx]

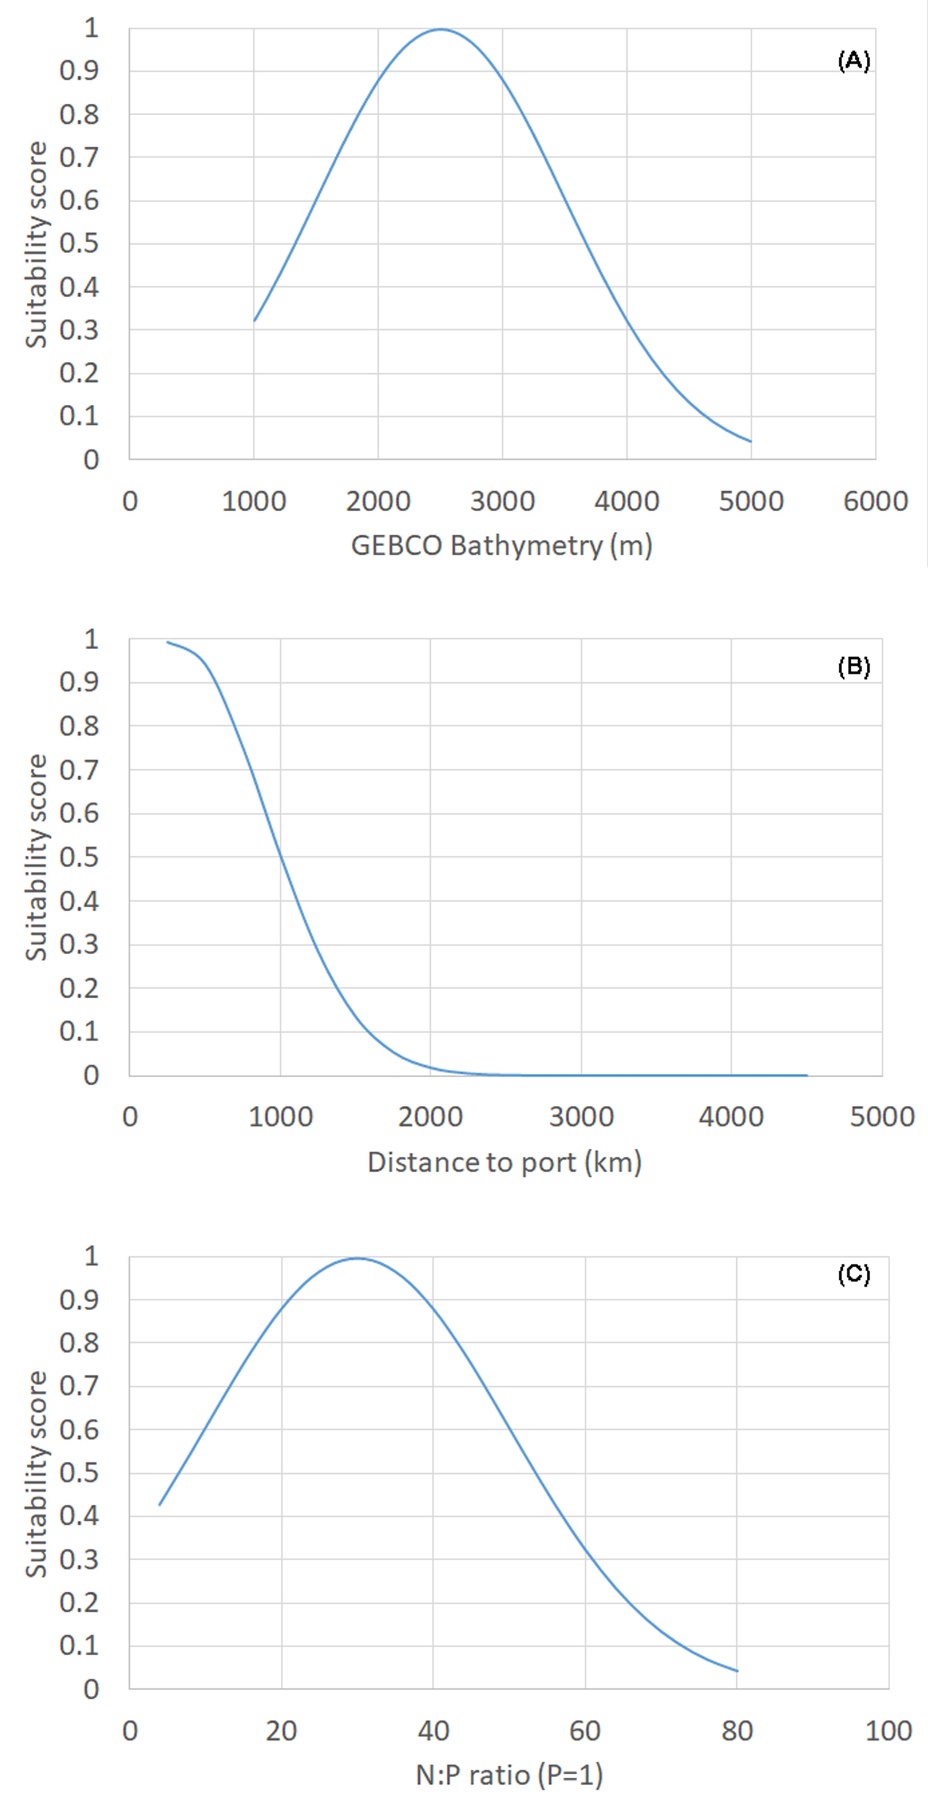


Figure S1: Gaussian function applied to: (A) GEBCO bathymetry, (B) Distance to port and (C) nutrient ratio N:P.
